# Supplementary material for: Communication processes about predictive genetic testing within high-risk breast cancer families: a two-phase study design
Source: PubMed Central journal article supplement (PMC8505562; doi:10.1038/s41598-021-98737-8), 2021-10-11
Supplement: 41598_2021_98737_MOESM1_ESM.pdf [file 41598_2021_98737_MOESM1_ESM.pdf]

# Supplementary Material

---

## Figure S1: Interview guide for the focus groups

### Interview guide for the focus groups

---

- **Assess experience of genetic testing**
  - How did you first learn about the gene mutation and the familial risk?
    - Which family member was affected by the gene mutation?
    - Who informed you and in which context?
  - How did you experience the genetic testing of your family member?
    - Which information did you find useful?
    - How was your own mental state and the family members state?
    - Did you observe supportive or obstructive thoughts or circumstances?
  
- **Explore communication process**
  - How did your family deal with and communicate about the issue?
    - How was the conversation about familial predisposition?
    - When did the conversations take place?
    - Which issues were addressed specifically?
    - Which information did you get that addressed you as a family member?
    - How did you personally feel during these conversations?
    - Did you feel that the mutation carrier was able to cope with informing you about the gene alteration?
  - What consequences and challenges have you experienced during conversation within the family?
    - Did you get an idea of your own risk?
    - Did you draw any concrete conclusions yourself?
    - Have you undergone genetic counseling and testing after the conversation? If not, which were the reasons why you decided against genetic counseling?
  
- **Define changing points to optimize communication**
  - What can be done from health care systems' side to facilitate the processing of information on familial genetic alteration and to support positive coping?
  - What can be done to encourage uptake of genetic testing by relatives at risk?
  - What would you expect from optimal health care? (for instance, specific written information material, internet addresses, consultations with psychological professionals)

---

*Note.* The interview guide was originally formulated in German and was translated into English for the manuscript.
